# Supplementary material for: Theoretical study of proton encircling modes in proton sponges with tetraamido/diamino quaternized macrocycles: the role of π-conjugated and aliphatic bridges
Source: Royal Society of Chemistry journal article supplement (doi:10.1039/b821127b), 2009-01-01
Supplement: b821127b.pdf [file b821127b.pdf]

# Supplementary Material of B821127B

## Theoretical Study of Proton Encircling Modes in Proton Sponges with Tetraamido/Diamino Quaternized Macrocycles: The Role of $\pi$ -Conjugated and Aliphatic Bridges

Nan Jiang, Jing Ma\*

School of Chemistry and Chemical Engineering, Institute of Theoretical and Computational Chemistry, Key Laboratory of Mesoscopic Chemistry of MOE, Nanjing University, Nanjing, 210093, People's Republic of China  
E-mail: [majing@nju.edu.cn](mailto:majing@nju.edu.cn), Fax: 86-25-83596131, Tel: 86-25-83597408

|                                                                                                                                                                              |    |
|------------------------------------------------------------------------------------------------------------------------------------------------------------------------------|----|
| <b>Table S1.</b> Hartree-Fock RHF→UHF stability tests for tetraamido/diamino quaternized macrocyclic complexes with proton.....                                              | S2 |
| <b>Table S2.</b> The difference (kcal/mol) in electronic energies and enthalpies between protonated and unprotonated macrocycles.....                                        | S2 |
| <b>Table S3.</b> The energy barriers of proton transfer between two carbonyl oxygen atoms.....                                                                               | S2 |
| <b>Table S4.</b> Calculated NBO atomic charges on atoms involving the encircled proton and the hetero atoms in the aromatic rings in the aromatic-bridged macrocycles...     | S3 |
| <b>Table S5.</b> Some selected geometric parameters in the hydrogen bond frameworks.....                                                                                     | S4 |
| <b>Table S6.</b> Contribution of individual subsystems to the hydrogen bond energies, obtained from fragmentation method.....                                                | S5 |
| <b>Table S7.</b> Calculated NBO atomic charges located on atoms involving intramolecular hydrogen bonds and the Coulombic interaction energies (kcal/mol) between H...O..... | S5 |
| <b>Fig. S1</b> Side view of B3LYP/6-31G( <i>d,p</i> ) optimized structures of the macrocyclic complexes with proton.....                                                     | S6 |
| <b>Fig. S2</b> Side view of B3LYP/6-31G( <i>d,p</i> ) optimized transition states of proton transfer in macrocyclic analogues.....                                           | S7 |

**Table S1.** Hartree-Fock RHF→UHF stability tests for tetraamido/diamino quaternized macrocyclic complexes with proton.

| System                 | Stability of wave function |       |
|------------------------|----------------------------|-------|
|                        | HF                         | B3LYP |
| <b>1a</b> (phenyl)     | no                         | yes   |
| <b>1b</b> (pyridine)   | no                         | yes   |
| <b>2a</b> (furan)      | no                         | yes   |
| <b>2b</b> (thiophene)  | no                         | yes   |
| <b>3a</b> (butadienyl) | no                         | yes   |
| <b>3b</b> (ethylene)   | no                         | yes   |
| <b>4</b> (propyl)      | yes                        | yes   |
| <b>5</b> (butyl)       | yes                        | yes   |

**Table S2.** The difference (kcal/mol) in electronic energies and enthalpies between the protonated and unprotonated macrocycles.

|                        | $\Delta E^a$ | $\Delta H^b$ |
|------------------------|--------------|--------------|
| <b>1a</b> (phenyl)     | 137.9        | 132.0        |
| <b>1b</b> (pyridine)   | 136.0        | 130.1        |
| <b>2a</b> (furan)      | 130.5        | 125.2        |
| <b>2b</b> (thiophene)  | 125.1        | 119.5        |
| <b>3a</b> (butadienyl) | 129.4        | 123.4        |
| <b>3b</b> (ethylene)   | 145.8        | 139.5        |
| <b>4</b> (propyl)      | 149.0        | 145.3        |
| <b>5</b> (butyl)       | 143.5        | 138.5        |

<sup>a</sup>The electronic energies are computed at MP2/6-31G(*d,p*) //B3LYP/6-31G(*d,p*) level.

<sup>b</sup>The Enthalpies are computed at B3LYP/6-31G(*d,p*)+ZPE level.

**Table S3.** The activation barriers,  $\Delta E_A$ , (in units of kcal/mol) of proton transfer in O–H···O  $\rightleftharpoons$  O···H–O hydrogen bonds.

|                        | B3LYP/6-31G( <i>d,p</i> ) |                   | MP2/6-31G( <i>d,p</i> ) //B3LYP/6-31G( <i>d,p</i> ) |                   |
|------------------------|---------------------------|-------------------|-----------------------------------------------------|-------------------|
|                        | $\Delta E_A$              | $\Delta E_A$ +ZPE | $\Delta E_A$                                        | $\Delta E_A$ +ZPE |
| <b>1a</b> (phenyl)     | −0.22                     | −1.48             | 0.31                                                | 0.24              |
| <b>1b</b> (pyridine)   | −0.21                     | −1.44             | 0.39                                                | 0.33              |
| <b>2a</b> (furan)      | −0.95                     | −1.54             | 1.07                                                | 0.23              |
| <b>2b</b> (thiophene)  | −1.30                     | −1.20             | 3.20                                                | 2.65              |
| <b>3a</b> (butadienyl) | −0.78                     | −1.41             | 1.82                                                | 0.77              |
| <b>3b</b> (ethylene)   | −1.02                     | −1.87             | 0.23                                                | 0.16              |
| <b>5</b> (butyl)       | −0.73                     | −0.82             | 0.29                                                | 0.20              |

**Table S4.** Calculated NBO atomic charges at the MP2/6-31G(*d,p*)/B3LYP/6-31G(*d,p*) level on the encircled proton and the hetero atoms in the aromatic rings in the aromatic ring-bridged macrocycles.

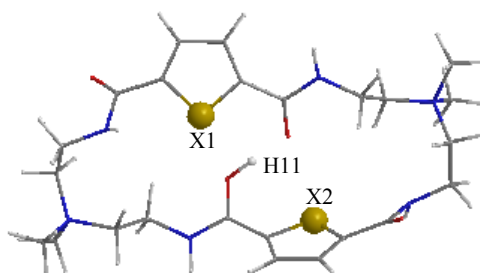

|                                             | NBO charges |       |      | Interatomic distance |                     |
|---------------------------------------------|-------------|-------|------|----------------------|---------------------|
|                                             | X1          | X2    | H11  | $r_{X1 \cdots H11}$  | $r_{X2 \cdots H11}$ |
| <b>Proton-trapped minima</b>                |             |       |      |                      |                     |
| <b>1a</b> (phenyl)                          | -0.14       | -0.12 | 0.60 | 2.73                 | 2.62                |
| <b>1b</b> (pyridine)                        | -0.48       | -0.47 | 0.61 | 2.70                 | 2.53                |
| <b>2a</b> (furan)                           | -0.54       | -0.53 | 0.60 | 2.51                 | 2.40                |
| <b>2b</b> (thiophene)                       | 0.47        | 0.56  | 0.60 | 2.85                 | 2.69                |
| <b>Transition states of proton transfer</b> |             |       |      |                      |                     |
| <b>1a</b> (phenyl)                          | -0.13       | -0.13 | 0.60 | 2.68                 | 2.68                |
| <b>1b</b> (pyridine)                        | -0.47       | -0.47 | 0.61 | 2.62                 | 2.62                |
| <b>2a</b> (furan)                           | -0.53       | -0.53 | 0.60 | 2.46                 | 2.46                |
| <b>2b</b> (thiophene)                       | 0.52        | 0.52  | 0.59 | 2.74                 | 2.74                |

**Table S5.** Selected interatomic distances (Å) and angles (°) in the hydrogen bond frameworks in tetraamido/diamino macrocycles containing  $\pi$ -conjugated or aliphatic bridges. The corresponding geometric parameters of transition states of proton transfer are also given. The calculations are carried out at B3LYP/6-31G(*d,p*) level.

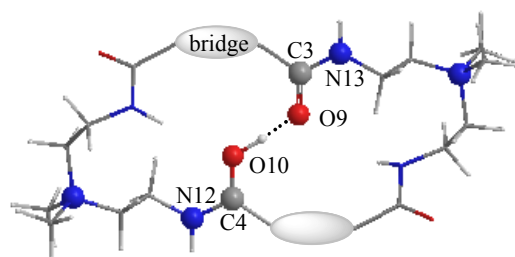

|                                             | $\pi$ -Conjugated bridge |                         |                      |                          |                           |                         | Aliphatic bridge                  |                     |
|---------------------------------------------|--------------------------|-------------------------|----------------------|--------------------------|---------------------------|-------------------------|-----------------------------------|---------------------|
|                                             | <b>1a</b><br>(phenyl)    | <b>1b</b><br>(pyridine) | <b>2a</b><br>(furan) | <b>2b</b><br>(thiophene) | <b>3a</b><br>(butadienyl) | <b>3b</b><br>(ethylene) | <b>4</b><br>(propyl) <sup>a</sup> | <b>5</b><br>(butyl) |
| <b>Proton-trapped minima</b>                |                          |                         |                      |                          |                           |                         |                                   |                     |
| $r_{C3=O9}$                                 | 1.261                    | 1.251                   | 1.256                | 1.253                    | 1.259                     | 1.257                   | 1.267                             | 1.263               |
| $r_{C4=O10}$                                | 1.286                    | 1.275                   | 1.285                | 1.301                    | 1.298                     | 1.284                   | 1.267                             | 1.274               |
| $r_{C3-N13}$                                | 1.351                    | 1.352                   | 1.354                | 1.351                    | 1.352                     | 1.352                   | 1.336                             | 1.340               |
| $r_{C4-N12}$                                | 1.338                    | 1.336                   | 1.340                | 1.332                    | 1.333                     | 1.329                   | 1.336                             | 1.333               |
| $\angle O9-C3-N13$                          | 119.4                    | 120.4                   | 120.9                | 120.6                    | 121.2                     | 119.0                   | 117.8                             | 119.4               |
| $\angle O10-C4-N12$                         | 116.6                    | 117.7                   | 117.8                | 117.6                    | 117.9                     | 115.8                   | 117.8                             | 118.3               |
| <b>Transition states of proton transfer</b> |                          |                         |                      |                          |                           |                         |                                   |                     |
| $r_{C3=O9}$                                 | 1.273                    | 1.262                   | 1.269                | 1.274                    | 1.278                     | 1.274                   | --                                | 1.272               |
| $r_{C4=O10}$                                | 1.273                    | 1.262                   | 1.269                | 1.274                    | 1.278                     | 1.274                   | --                                | 1.272               |
| $r_{C3-N13}$                                | 1.344                    | 1.344                   | 1.344                | 1.342                    | 1.342                     | 1.350                   | --                                | 1.335               |
| $r_{C4-N12}$                                | 1.344                    | 1.344                   | 1.344                | 1.342                    | 1.342                     | 1.350                   | --                                | 1.335               |
| $\angle O9-C3-N13$                          | 118.0                    | 119.1                   | 119.4                | 119.2                    | 120.5                     | 118.0                   | --                                | 118.6               |
| $\angle O10-C4-N12$                         | 118.0                    | 119.1                   | 119.4                | 119.1                    | 120.5                     | 118.0                   | --                                | 118.6               |

<sup>a</sup> In the propyl-containing macrocycle **4**, there is only a single-minimum for proton binding.

**Table S6.** Contributions from individual subsystems to the strength of hydrogen bonds, obtained from the energy-based fragmentation method at MP2/6–31G(*d,p*) level.

|           | Sub1 (Sub3) | Sub2 (Sub4) |
|-----------|-------------|-------------|
| <b>1a</b> | 18.9        | −5.4        |
| <b>1b</b> | 18.4        | −5.3        |
| <b>2a</b> | 18.2        | −5.2        |
| <b>2b</b> | 16.6        | −5.1        |
| <b>3a</b> | 17.8        | −5.1        |
| <b>3b</b> | 21.5        | −4.7        |
| <b>4</b>  | 25.2        | −4.8        |
| <b>5</b>  | 20.4        | −4.7        |

**Table S7.** NBO charges on the oxygen and hydrogen atoms involved in the hydrogen bonding interactions.<sup>a</sup> The Coulombic interaction energies (kcal/mol) between H⋯O are also listed in the last column.

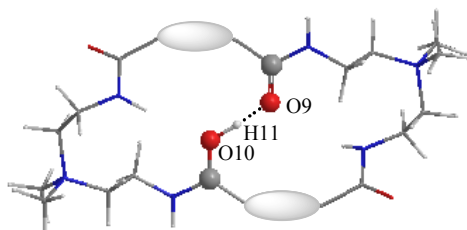

|                        | NBO charges |      |       | Coulombic interaction <sup>b</sup> |
|------------------------|-------------|------|-------|------------------------------------|
|                        | O9          | H11  | O10   |                                    |
| <b>1a</b> (phenyl)     | −0.83       | 0.60 | −0.79 | −118.7                             |
| <b>1b</b> (pyridine)   | −0.79       | 0.61 | −0.76 | −113.5                             |
| <b>2a</b> (furan)      | −0.79       | 0.60 | −0.77 | −109.5                             |
| <b>2b</b> (thiophene)  | −0.81       | 0.60 | −0.77 | −99.7                              |
| <b>3a</b> (butadienyl) | −0.83       | 0.59 | −0.77 | −101.1                             |
| <b>3b</b> (ethylene)   | −0.80       | 0.60 | −0.78 | −124.6                             |
| <b>4</b> (propyl)      | −0.80       | 0.59 | −0.80 | −130.2                             |
| <b>5</b> (butyl)       | −0.81       | 0.60 | −0.79 | −120.5                             |

<sup>a</sup> The calculations are carried out at MP2/6-31G(*d,p*)/B3LYP/6-31G(*d,p*) level.

<sup>b</sup>The interatomic Coulombic interaction energies are calculated by

$$E^{Coulomb} = 330.26q_{O9}q_{H11} / r_{O9\cdots H11}$$

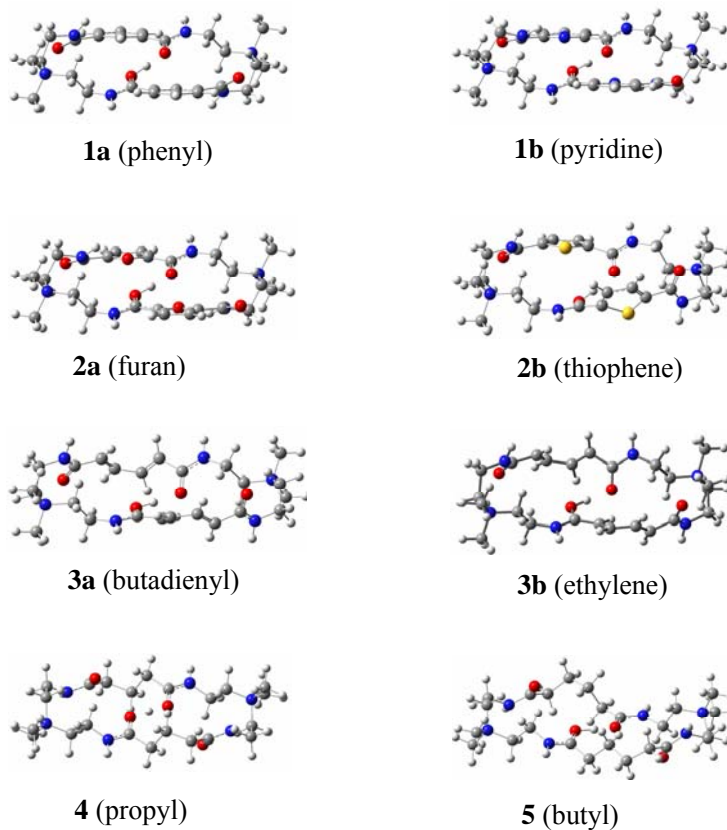

**Fig. S1** Side view of B3LYP/6-31G(*d,p*) optimized structures of the complexes formed by proton and tetraamido/diamino quaternized macrocyclic analogues **1a** (phenyl), **1b** (pyridine), **2a** (furan), **2b** (thiophene), **3a** (butadienyl), **3b** (ethylene), **4** (propyl), and **5** (butyl).

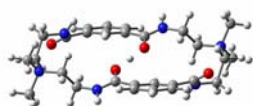

**1a-TS** (phenyl)

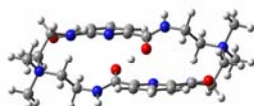

**1b-TS** (pyridine)

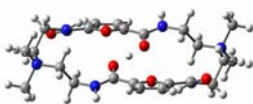

**2a-TS** (furan)

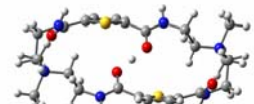

**2b-TS** (thiophene)

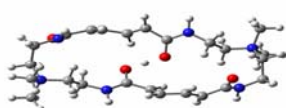

**3a-TS** (butadienyl)

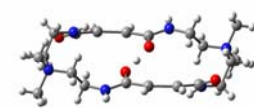

**3b-TS** (ethylene)

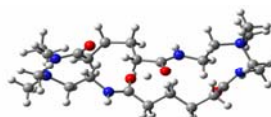

**5-TS** (butyl)

**Fig. S2** Side view of the transition states of proton transfer in macrocyclic analogues **1a** (phenyl), **1b** (pyridine), **2a** (furan), **2b** (thiophene), **3a** (butadienyl), **3b** (ethylene), and **5** (butyl). The structural optimization are carried out at B3LYP/6-31G(*d,p*) level, and there is only a single-minimum for proton binding in propyl-containing **4**.
